# Supplementary material for: Self-assembly of non-macrocyclic triangular Ni3Ln clusters
Source: Royal Society of Chemistry journal article supplement (doi:10.1039/d1dt03742k), 2021-12-20
Supplement: d1dt03742k1.pdf [file d1dt03742k1.pdf]

Supporting Information For:

## Self-assembly of non-macrocyclic triangular Ni<sub>3</sub>Ln clusters

Tyson N. Dais,<sup>†</sup> Rina Takano,<sup>‡</sup> Takayuki Ishida,<sup>‡</sup> and Paul G. Plieger<sup>\*†</sup>

<sup>†</sup> School of Fundamental Sciences, Massey University, Private Bag 11 222, Palmerston North, New Zealand.

<sup>‡</sup> Department of Engineering Science, Graduate School of Informatics and Engineering, The University of Electro-Communications, 1-5-1 Chofugaoka, Chofu, Tokyo 182-8585, Japan.

\* E-mail: p.g.plieger@massey.ac.nz

### Table of Contents

|                                                                                                                                              |    |
|----------------------------------------------------------------------------------------------------------------------------------------------|----|
| <b>Table S1.</b> .....                                                                                                                       | 2  |
| <b>Table S2.</b> .....                                                                                                                       | 3  |
| <b>Table S3.</b> .....                                                                                                                       | 3  |
| <b>Table S4.</b> .....                                                                                                                       | 4  |
| <b>Fitting parameters, <i>A</i> and <i>B</i>, for the van Vleck equation used to fit <math>\chi_m T</math> vs <i>T</i> plot for C3</b> ..... | 4  |
| <b>Figure S1.</b> .....                                                                                                                      | 5  |
| <b>Figure S2.</b> .....                                                                                                                      | 5  |
| <b>Figure S3.</b> .....                                                                                                                      | 6  |
| <b>Figure S5.</b> .....                                                                                                                      | 7  |
| <b>Figure S6.</b> .....                                                                                                                      | 7  |
| <b>Figure S7.</b> .....                                                                                                                      | 8  |
| <b>Figure S8.</b> .....                                                                                                                      | 8  |
| <b>Figure S9.</b> .....                                                                                                                      | 9  |
| <b>Figure S10.</b> .....                                                                                                                     | 9  |
| <b>Figure S11.</b> .....                                                                                                                     | 9  |
| <b>Figure S12.</b> .....                                                                                                                     | 10 |
| <b><a href="#">Figure S13.</a></b> .....                                                                                                     | 10 |
| <b><a href="#">Figure S14.</a></b> .....                                                                                                     | 10 |

**Table S1.** Crystal structure and refinement details for complexes **C1 – C4**. CCDC deposition numbers 2116396 – 2116399.

| Complex                                                | C1                                                                               | C2                                                                                   | C3                                                                               | C4                                                                               |
|--------------------------------------------------------|----------------------------------------------------------------------------------|--------------------------------------------------------------------------------------|----------------------------------------------------------------------------------|----------------------------------------------------------------------------------|
| <b>Deposition number</b>                               | 2116396                                                                          | 2116398                                                                              | 2116399                                                                          | 2116397                                                                          |
| <b>Molecular formula</b>                               | C <sub>38</sub> H <sub>46</sub> LaN <sub>3</sub> Ni <sub>3</sub> O <sub>33</sub> | C <sub>37.5</sub> H <sub>36</sub> EuN <sub>3</sub> Ni <sub>3</sub> O <sub>28.5</sub> | C <sub>45</sub> H <sub>54</sub> GdN <sub>3</sub> Ni <sub>3</sub> O <sub>30</sub> | BaC <sub>43</sub> H <sub>52</sub> N <sub>2</sub> Ni <sub>3</sub> O <sub>28</sub> |
| <b>Formula weight</b>                                  | 1387.82                                                                          | 1312.78                                                                              | 1450.29                                                                          | 1358.33                                                                          |
| <b>Temperature /K</b>                                  | 100                                                                              | 100                                                                                  | 100                                                                              | 100                                                                              |
| <b>Crystal system</b>                                  | monoclinic                                                                       | monoclinic                                                                           | monoclinic                                                                       | triclinic                                                                        |
| <b>Space group</b>                                     | <i>P2<sub>1</sub>/n</i>                                                          | <i>C2/c</i>                                                                          | <i>P2<sub>1</sub>/n</i>                                                          | <i>P1</i>                                                                        |
| <b>a /Å</b>                                            | 10.4295(8)                                                                       | 12.7986(12)                                                                          | 17.0721(10)                                                                      | 11.0862(6)                                                                       |
| <b>b /Å</b>                                            | 19.2819(15)                                                                      | 16.5467(16)                                                                          | 18.7861(11)                                                                      | 15.5290(9)                                                                       |
| <b>c /Å</b>                                            | 24.0313(18)                                                                      | 39.9720(4)                                                                           | 17.1302(10)                                                                      | 16.8872(9)                                                                       |
| <b>α /°</b>                                            | 90                                                                               | 90                                                                                   | 90                                                                               | 115.311(4)                                                                       |
| <b>β /°</b>                                            | 102.277(3)                                                                       | 90.203(3)                                                                            | 106.716(3)                                                                       | 101.491(4)                                                                       |
| <b>γ /°</b>                                            | 90                                                                               | 90                                                                                   | 90                                                                               | 97.235(4)                                                                        |
| <b>Volume /Å<sup>3</sup></b>                           | 4722.2(6)                                                                        | 8464.9(14)                                                                           | 5261.8(5)                                                                        | 2501.3(3)                                                                        |
| <b>Z/Z'</b>                                            | 4 / 1                                                                            | 8 / 1                                                                                | 4 / 1                                                                            | 2 / 1                                                                            |
| <b>ρ<sub>calc</sub> /g cm<sup>-3</sup></b>             | 1.952                                                                            | 2.06                                                                                 | 1.831                                                                            | 1.804                                                                            |
| <b>μ /mm<sup>-1</sup></b>                              | 9.197                                                                            | 12.934                                                                               | 10.111                                                                           | 8.159                                                                            |
| <b>F(000)</b>                                          | 2800                                                                             | 5256                                                                                 | 2932                                                                             | 1376                                                                             |
| <b>Crystal size /mm</b>                                | 0.24 × 0.18 × 0.04                                                               | 0.18 × 0.14 × 0.10                                                                   | 0.23 × 0.10 × 0.10                                                               | 0.21 × 0.20 × 0.16                                                               |
| <b>Radiation</b>                                       | CuK <sub>α</sub> (λ = 1.54178)                                                   | CuK <sub>α</sub> (λ = 1.54178)                                                       | CuK <sub>α</sub> (λ = 1.54178)                                                   | CuK <sub>α</sub> (λ = 1.54178)                                                   |
| <b>2θ range /°</b>                                     | 5.93 to 136.49                                                                   | 4.42 to 136.46                                                                       | 6.44 to 136.48                                                                   | 6.03 to 136.48                                                                   |
| <b>Reflections collected</b>                           | 28526                                                                            | 129662                                                                               | 143215                                                                           | 68979                                                                            |
| <b>Independent reflections</b>                         | 8337                                                                             | 7697                                                                                 | 9641                                                                             | 8850                                                                             |
| <b>Restraints/parameters</b>                           | 4 / 730                                                                          | 14 / 682                                                                             | 70 / 799                                                                         | 21 / 678                                                                         |
| <b>Goof on F<sup>2</sup></b>                           | 1.081                                                                            | 1.046                                                                                | 1.025                                                                            | 1.056                                                                            |
| <b>Final R indices [I ≥ 2σ(I)]</b>                     | R <sub>1</sub> = 0.0580,<br>wR <sub>2</sub> = 0.1659                             | R <sub>1</sub> = 0.0249,<br>wR <sub>2</sub> = 0.0674                                 | R <sub>1</sub> = 0.0232,<br>wR <sub>2</sub> = 0.0607                             | R <sub>1</sub> = 0.0771,<br>wR <sub>2</sub> = 0.1548                             |
| <b>Final R indices [all data]</b>                      | R <sub>1</sub> = 0.0607,<br>wR <sub>2</sub> = 0.1719                             | R <sub>1</sub> = 0.0250,<br>wR <sub>2</sub> = 0.0675                                 | R <sub>1</sub> = 0.0242,<br>wR <sub>2</sub> = 0.0613                             | R <sub>1</sub> = 0.1034,<br>wR <sub>2</sub> = 0.1672                             |
| <b>Residual density / e<sup>-</sup> Å<sup>-3</sup></b> | 1.92/-2.27                                                                       | 0.68/-0.72                                                                           | 0.76/-0.57                                                                       | 1.23/-1.28                                                                       |

**Table S2.** Selected distances and angles for C1 – C4.

| Distance / Å                                 | C1         | C2         | C3         | C4         | Ni <sub>3</sub> DyL' <sub>3</sub> | Ni <sub>3</sub> YbL' <sub>3</sub> |
|----------------------------------------------|------------|------------|------------|------------|-----------------------------------|-----------------------------------|
| Ln <sup>III</sup> – O <sub>phenol</sub>      | 2.544(4) – | 2.473(2) – | 2.493(2) – | 2.686(6) – | 2.478(3) –                        | 2.449(5) –                        |
|                                              | 2.597(4)   | 2.543(2)   | 2.525(2)   | 2.752(6)   | 2.500(4)                          | 2.478(6)                          |
| Ln <sup>III</sup> – O <sub>nitrate</sub>     | 2.614(4) – | 2.487(2) – | 2.455(2) – | 2.824(8) – | 2.459(5) –                        | 2.404(7) –                        |
|                                              | 2.658(4)   | 2.555(2)   | 2.516(2)   | 3.306(7)   | 2.514(5)                          | 2.463(7)                          |
| Ln <sup>III</sup> – O <sub>water</sub>       | 2.515(4)   | —          | —          | 2.881(9)   | —                                 | —                                 |
| Ni <sup>II</sup> – O <sub>phenol</sub>       | 1.978(4) – | 1.963(2) – | 1.962(2) – | 1.990(6) – | 1.961(4) –                        | 1.961(6) –                        |
|                                              | 2.003(4)   | 1.999(2)   | 1.993(2)   | 2.015(6)   | 1.988(4)                          | 1.982(5)                          |
| Ni <sup>II</sup> – O <sub>formyl</sub>       | 1.983(4) – | 1.981(2) – | 1.975(2) – | 1.990(6) – | 2.004(4) –                        | 2.000(7) –                        |
|                                              | 2.016(4)   | 2.008(2)   | 2.023(2)   | 2.013(6)   | 2.017(4)                          | 2.011(6)                          |
| Ni <sup>II</sup> – O <sub>water</sub>        | 2.073(4) – | 2.076(2) – | —          | 2.067(6) – | —                                 | 1.983(16) –                       |
|                                              | 2.169(4)   | 2.167(2)   | —          | 2.112(6)   | —                                 | 2.080(30)                         |
| Ni <sup>II</sup> – O <sub>methanol</sub>     | 2.098(4)   | —          | 2.061(2) – | 2.068(7) – | 2.050(5) –                        | 2.055(7) –                        |
|                                              |            |            | 2.120(2)   | 2.099(7)   | 2.098(6)                          | 2.237(15)                         |
| Av. Ni <sup>II</sup> ... Ni <sup>II</sup>    | 6.339(2)   | 6.276(1)   | 6.296(1)   | 6.404(3)   | 6.364(3)                          | 6.342(3)                          |
| Av. Ni <sup>II</sup> ... Ln <sup>III</sup>   | 3.670(2)   | 3.625(1)   | 3.636(1)   | 3.761(2)   | 3.675(3)                          | 3.662(3)                          |
| Min. Ln <sup>III</sup> ... Ln <sup>III</sup> | 9.160(1)   | 9.767(1)   | 10.216(1)  | 10.430(1)  | 9.912(2)                          | 9.900(2)                          |
| <b>Angle / °</b>                             |            |            |            |            |                                   |                                   |
| Ni <sup>II</sup> – O – Ln <sup>III</sup>     | 105.6(2) – | 106.2(1) – | 106.1(1) – | 102.6(2) – | 109.8(2) –                        | 110.2(2) –                        |
|                                              | 107.3(2)   | 108.7(1)   | 108.9(1)   | 105.4(2)   | 110.9(2)                          | 111.2(2)                          |

**Table S3.** List of  $\pi$ – $\pi$  interactions with centroid-centroid distances and angles, as calculated by Olex2. The second plane in each row corresponds to a symmetry generated molecule.

| Complex | Planes                                                                                     | d <sub>centroid-centroid</sub> / Å | Angle / ° |
|---------|--------------------------------------------------------------------------------------------|------------------------------------|-----------|
| C1      | <i>&lt;C1, C2, C3, C4, C5, C6&gt;</i><br><i>&lt;C25, C26, C27, C28, C29, C30&gt;</i>       | 3.519                              | 5.130     |
|         | <i>&lt;C41, C42, C43, C44, C45, C50&gt;</i><br><i>&lt;C25, C26, C27, C28, C29, C30&gt;</i> | 3.597                              | 4.422     |
| C2      | <i>&lt;C41, C42, C43, C44, C45, C50&gt;</i><br><i>&lt;C45, C46, C47, C48, C49, C50&gt;</i> | 3.668                              | 8.272     |
|         | <i>&lt;C21, C22, C23, C24, C25, C30&gt;</i><br><i>&lt;C25, C26, C27, C28, C29, C30&gt;</i> | 3.820                              | 3.426     |
|         | <i>&lt;C1, C2, C3, C4, C5, C10&gt;</i><br><i>&lt;C25, C26, C27, C28, C29, C30&gt;</i>      | 3.885                              | 18.729    |
|         | <i>&lt;C41, C42, C43, C44, C45, C50&gt;</i><br><i>&lt;C41, C42, C43, C44, C45, C50&gt;</i> | 3.960                              | 8.900     |
| C3      | <i>&lt;C1, C2, C3, C4, C5, C10&gt;</i><br><i>&lt;C5, C6, C7, C8, C9, C10&gt;</i>           | 3.606                              | 5.855     |
|         | <i>&lt;C5, C6, C7, C8, C9, C10&gt;</i><br><i>&lt;C5, C6, C7, C8, C9, C10&gt;</i>           | 3.723                              | 0.000     |
|         | <i>&lt;C1, C2, C3, C4, C5, C10&gt;</i><br><i>&lt;C25, C26, C27, C28, C29, C30&gt;</i>      | 3.580                              | 3.674     |
| C4      | <i>&lt;C21, C22, C23, C24, C25, C30&gt;</i><br><i>&lt;C25, C26, C27, C28, C29, C30&gt;</i> | 3.714                              | 4.300     |

**Table S4.** Calculated high-temperature-limit values per ion and per molecule for **C1 – C3**.

|                   |                     | Per ion                             |                                                                      |                                                    |  |
|-------------------|---------------------|-------------------------------------|----------------------------------------------------------------------|----------------------------------------------------|--|
| <b>M</b>          | <b><i>J</i> (S)</b> | <b><i>g<sub>J</sub></i> (calc.)</b> | <b><math>\chi_m T / \text{cm}^3 \text{K mol}^{-1}</math> (calc.)</b> | <b><math>M_{\text{sat}} / \mu_B</math> (calc.)</b> |  |
| Ni <sup>II</sup>  | 1                   | 2                                   | 1.000                                                                | 2                                                  |  |
| Eu <sup>III</sup> | 0                   | -                                   | 0                                                                    | 0                                                  |  |
| Gd <sup>III</sup> | 7/2                 | 2                                   | 7.875                                                                | 7                                                  |  |

  

|                |                                                                      | Per molecule                         |                                                          |                                                    |  |
|----------------|----------------------------------------------------------------------|--------------------------------------|----------------------------------------------------------|----------------------------------------------------|--|
| <b>Complex</b> | <b><math>\chi_m T / \text{cm}^3 \text{K mol}^{-1}</math> (calc.)</b> | <b><math>\chi_m T</math> (calc.)</b> | <b><math>M_{\text{sat}} / \mu_B</math> (exp. at 7 T)</b> | <b><math>M_{\text{sat}} / \mu_B</math> (calc.)</b> |  |
| <b>C2</b>      | 7.57 (5000 Oe)                                                       | 3.00                                 | 8.07 (1.8 K, in eicosane)                                | 6                                                  |  |
|                | 7.49 (500 Oe)                                                        |                                      |                                                          |                                                    |  |
|                | 7.49 (500 Oe, in eicosane)                                           |                                      |                                                          |                                                    |  |
| <b>C3</b>      | 12.68 (5000 Oe)                                                      | 10.88                                | 13.66 (1.8 K, in eicosane)                               | 14                                                 |  |
|                | 12.45 (500 Oe)                                                       |                                      |                                                          |                                                    |  |
|                | 12.40 (500 Oe, in eicosane)                                          |                                      |                                                          |                                                    |  |

**Fitting parameters, *A* and *B*, for the van Vleck equation used to fit  $\chi_m T$  vs *T* plot for C3**

$$\begin{aligned}
 A &= 3\exp(-48J/k_B) + 30\exp(-45J/k_B) + 105\exp(-40J/k_B) + 60 \\
 &+ 315\exp(-30J/k_B) + 504\exp(-27J/k_B) + 495\exp(-24J/k_B) + \\
 &+ 990\exp(-18J/k_B) + 1485\exp(-14J/k_B) + 858\exp(-13J/k_B)
 \end{aligned} \quad (1)$$

$$\begin{aligned}
 B &= \exp(-48J/k_B) + 2\exp(-45J/k_B) + 3\exp(-40J/k_B) + 4\exp(-30J/k_B) \\
 &+ 8\exp(-27J/k_B) + 5\exp(-24J/k_B) + 12\exp(-23J/k_B) + 4\exp(-14J/k_B) \\
 &+ 6\exp(-13J/k_B) + 12\exp(-7J/k_B) + 7
 \end{aligned} \quad (2)$$

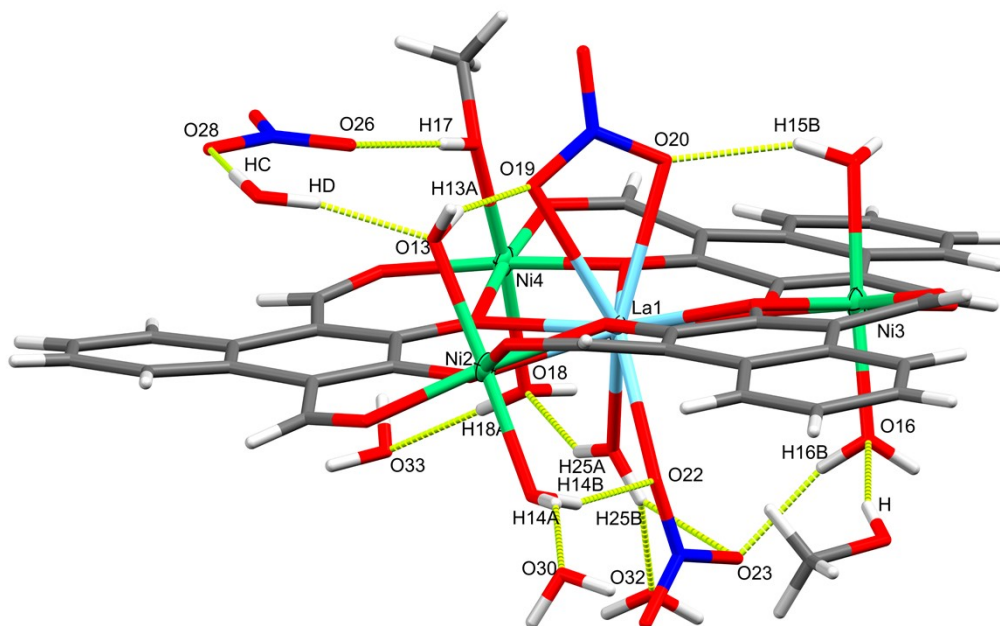

**Figure S1.** X-ray crystal structure showing the full asymmetry unit of **C1**. Thermal ellipsoids of metal atoms shown at the 70% probability level. C = grey, O = red, N = blue, H-bonds = yellow.

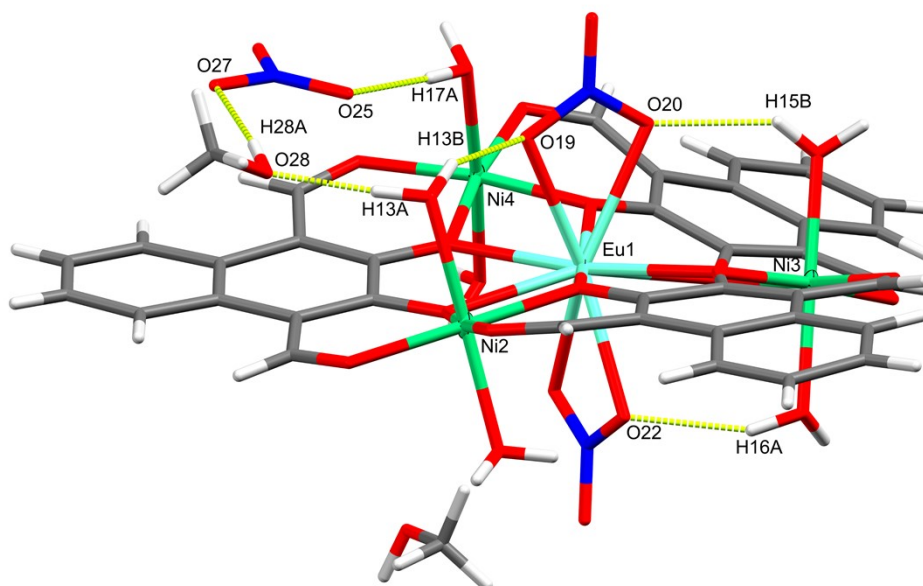

**Figure S2.** X-ray crystal structure showing the full asymmetry unit of **C2**. Thermal ellipsoids of metal atoms shown at the 70% probability level. C = grey, O = red, N = blue, H-bonds = yellow.

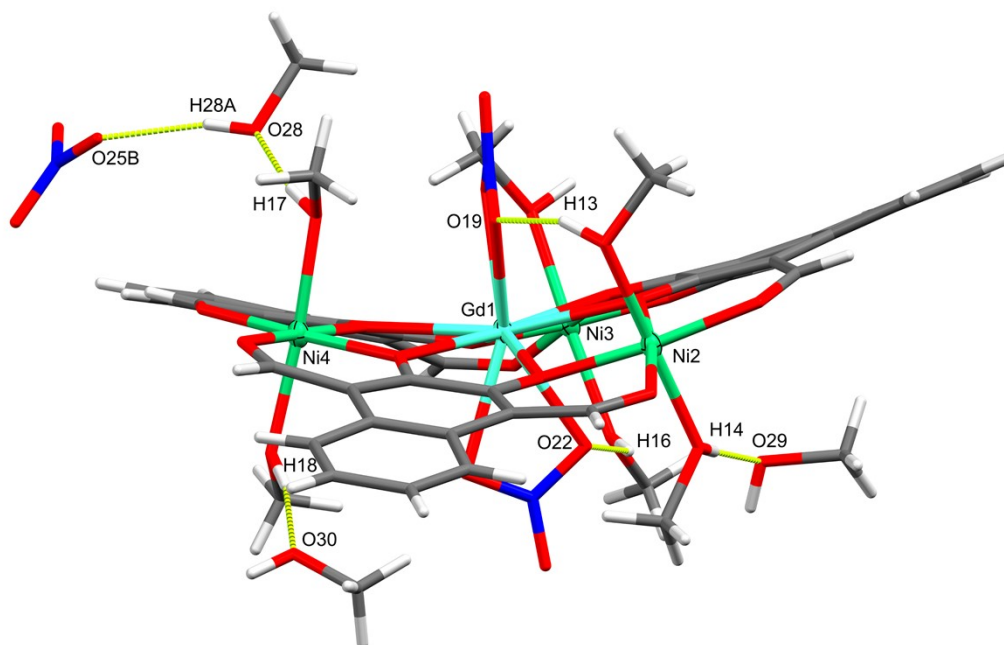

**Figure S3.** X-ray crystal structure showing the full asymmetry unit of **C3**. Thermal ellipsoids of metal atoms shown at the 70% probability level. C = grey, O = red, N = blue, H-bonds = yellow.

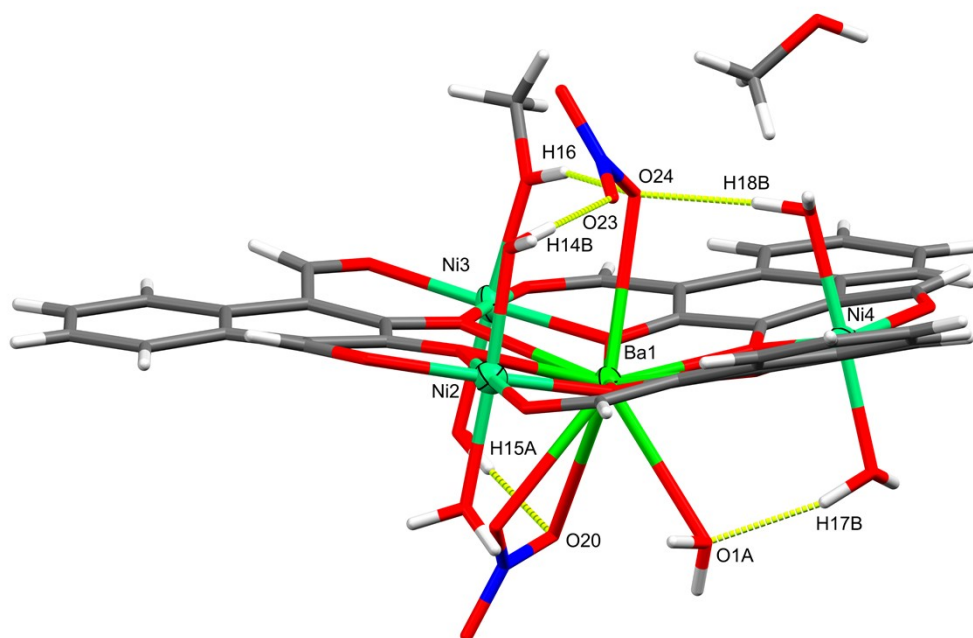

**Figure S4.** X-ray crystal structure showing the full asymmetry unit of **C4**. Thermal ellipsoids of metal atoms shown at the 70% probability level. C = grey, O = red, N = blue, H-bonds = yellow.

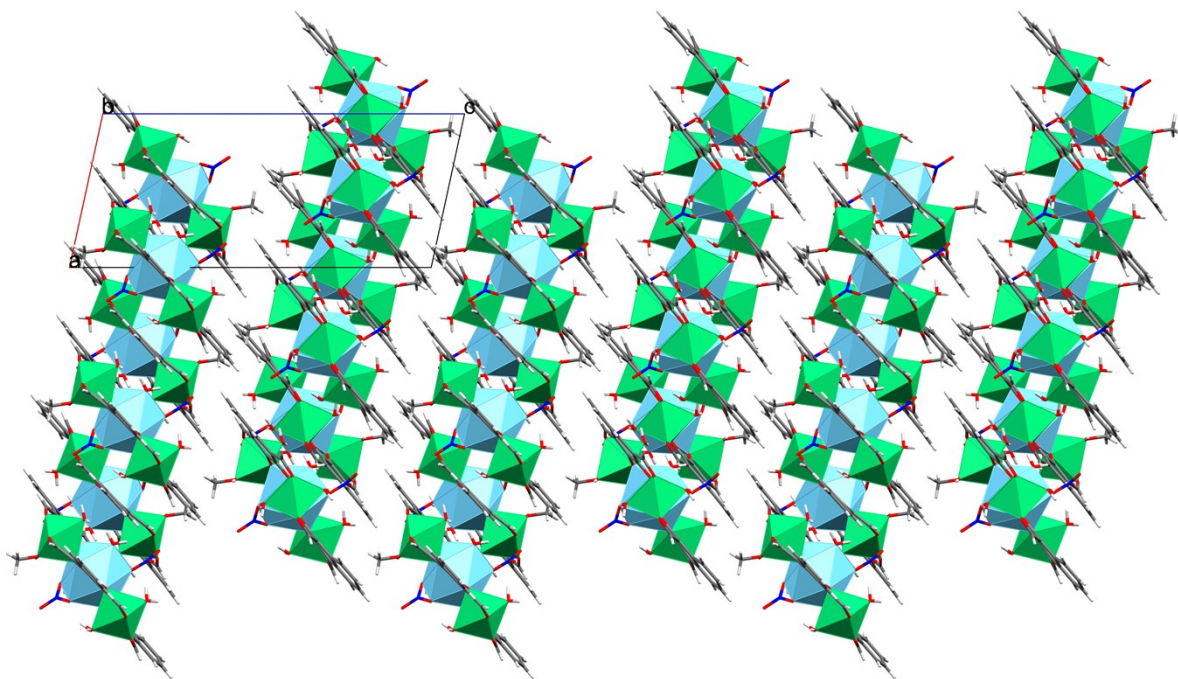

**Figure S5.** X-ray crystal packing diagram (3x3x3) of C1.

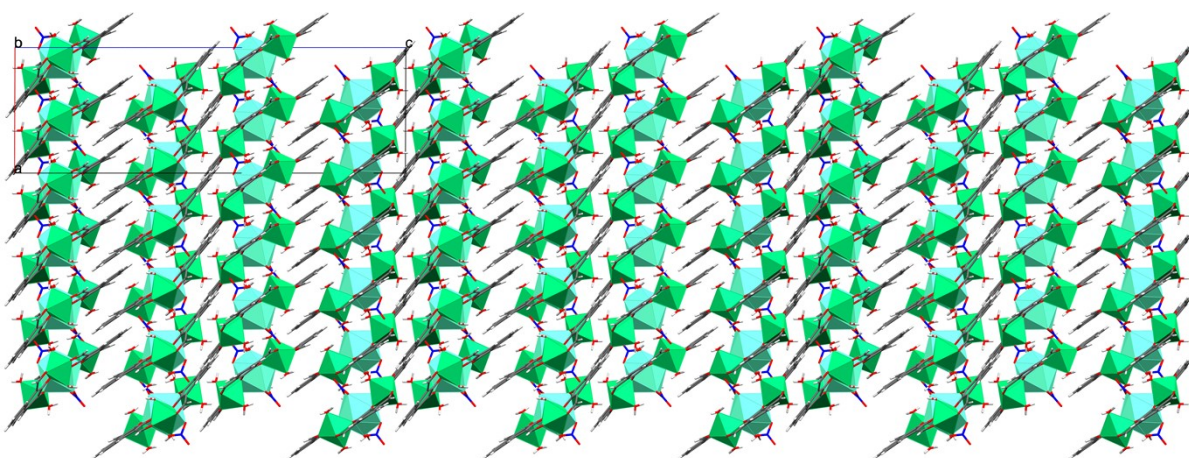

**Figure S6.** X-ray crystal packing diagram (3x3x3) of C2.

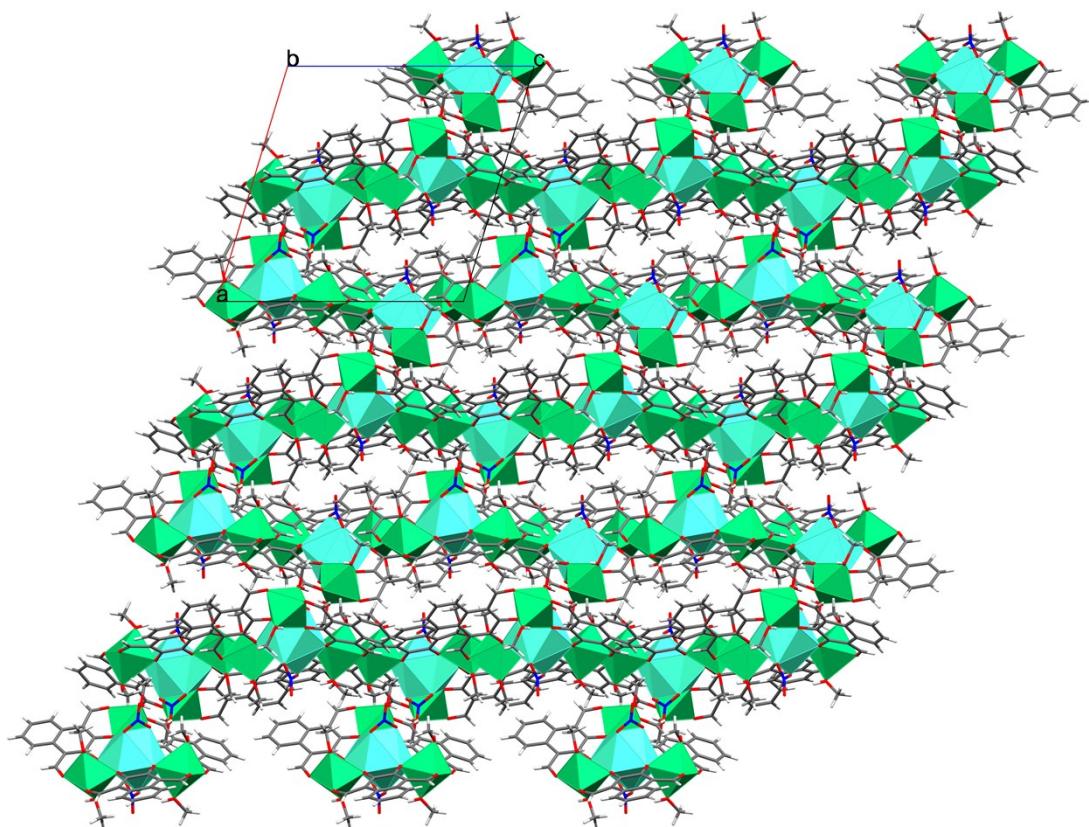

**Figure S7.** X-ray crystal packing diagram (3x3x3) of C3.

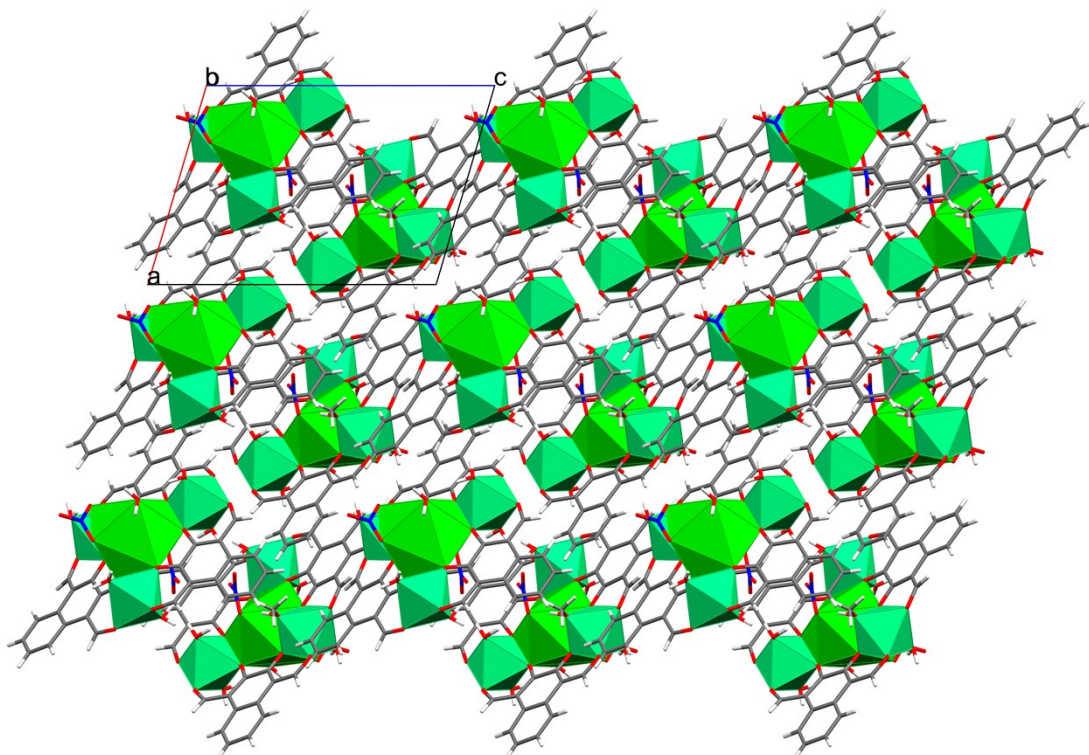

**Figure S8.** X-ray crystal packing diagram (3x3x3) of C4.



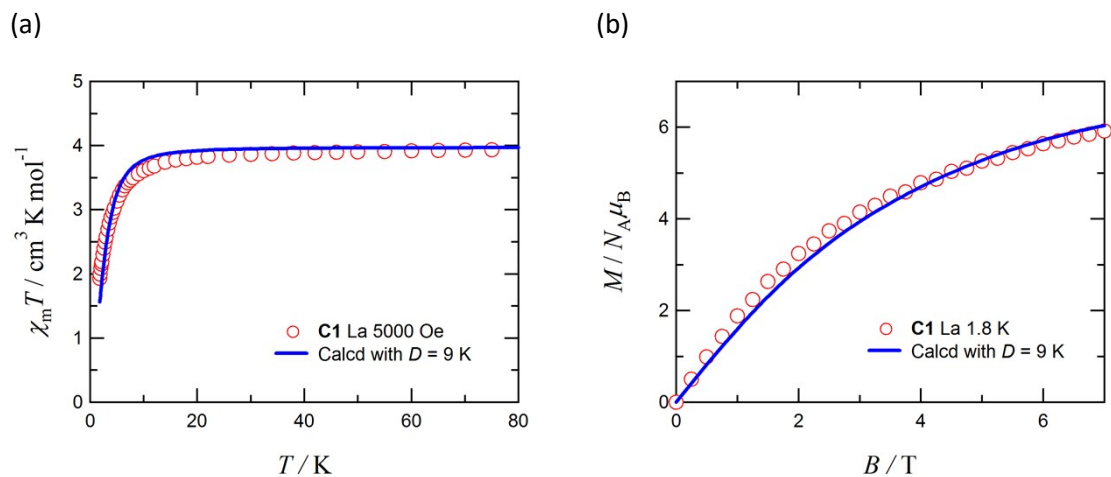

**Figure S9.** Simulation of the  $\chi_m T(T)$  and  $M(H)$  data on C1 for optimization of  $D$  with  $g_{\text{Ni}} = 2.30$ .

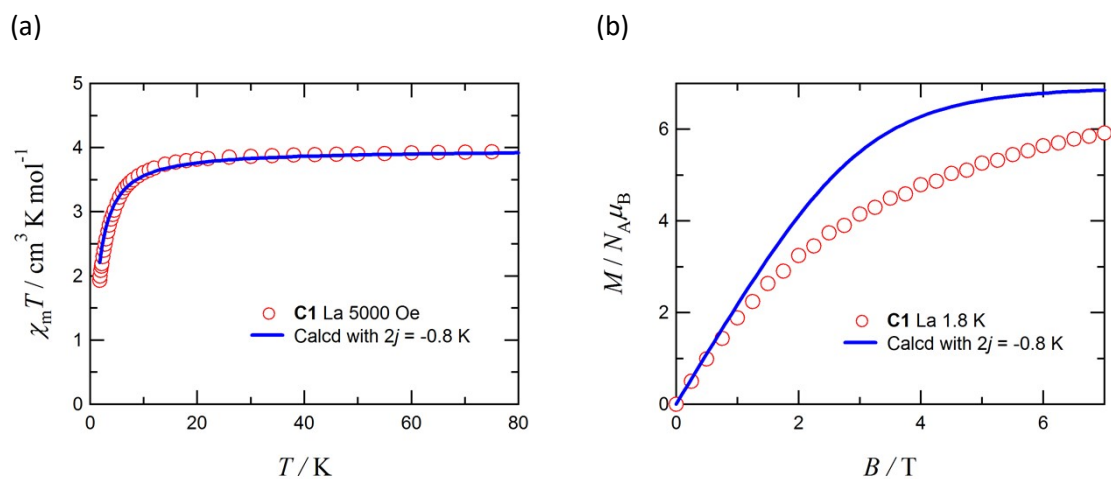

**Figure S10.** Simulation of the  $\chi_m T(T)$  and  $M(H)$  data on C1 for optimization of  $j_{\text{Ni-Ni}}$  with  $g_{\text{Ni}} = 2.30$ .

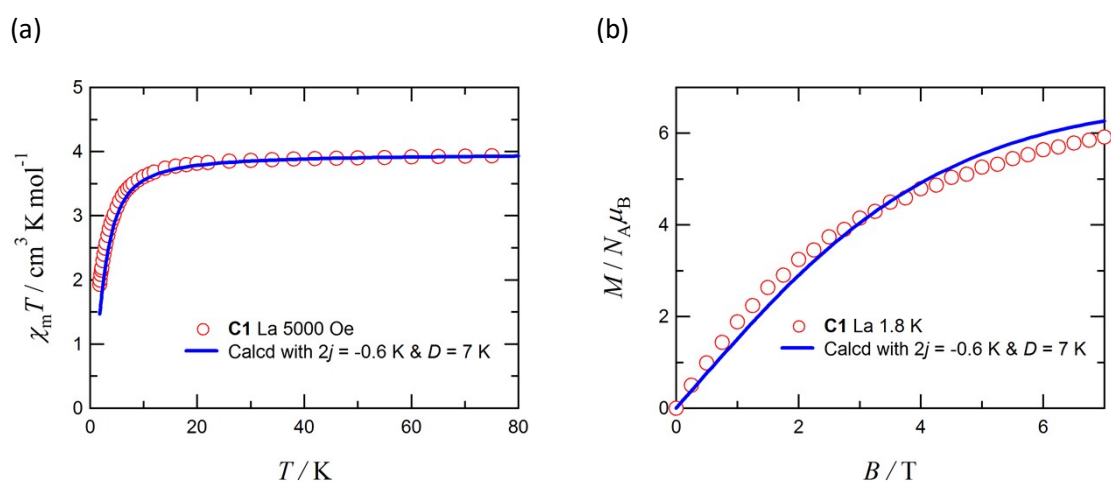

**Figure S11.** Simulation of the  $\chi_m T(T)$  and  $M(H)$  data on C1 with  $2j_{\text{Ni-Ni}} = -0.6$  K,  $D = 7$  K, and  $g_{\text{Ni}} = 2.30$ .

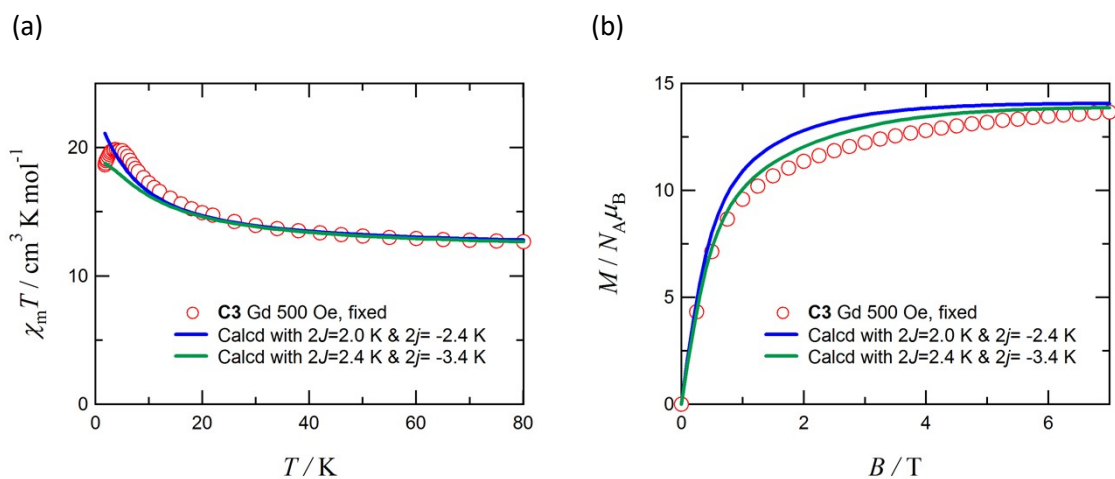

**Figure S12.** Simulation of the  $\chi_m T(T)$  and  $M(H)$  data on **C3** for optimization of  $J$  and  $j_{\text{Ni-Ni}}$  with  $g_{\text{Gd}} = 2.00$  and  $g_{\text{Ni}} = 2.36 - 2.30$ .

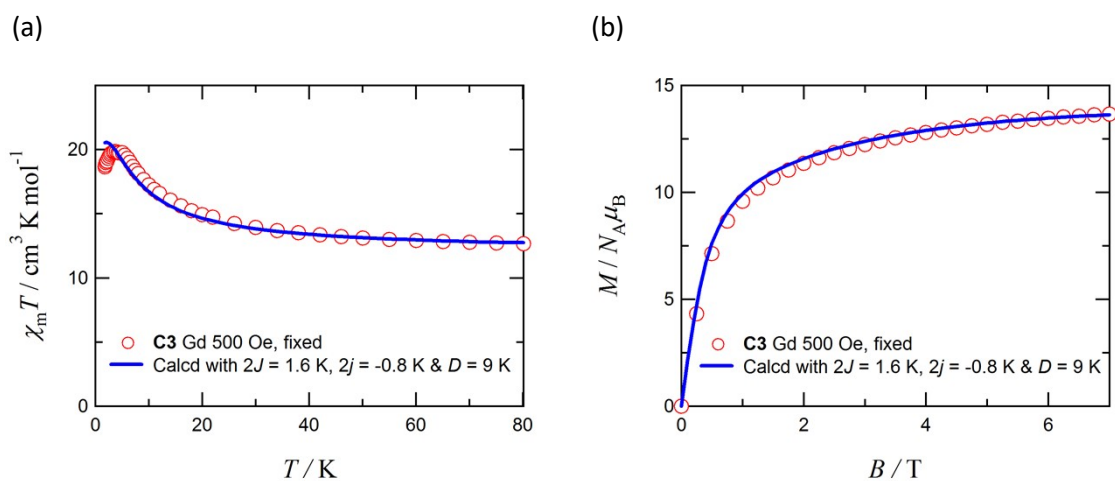

**Figure S13.** Simulation of the  $\chi_m T(T)$  and  $M(H)$  data on **C3** with  $2J = 1.6 \text{ K}$ ,  $2j_{\text{Ni-Ni}} = -0.8 \text{ K}$ ,  $D = 9 \text{ K}$ ,  $g_{\text{Gd}} = 2.00$ , and  $g_{\text{Ni}} = 2.36$ .

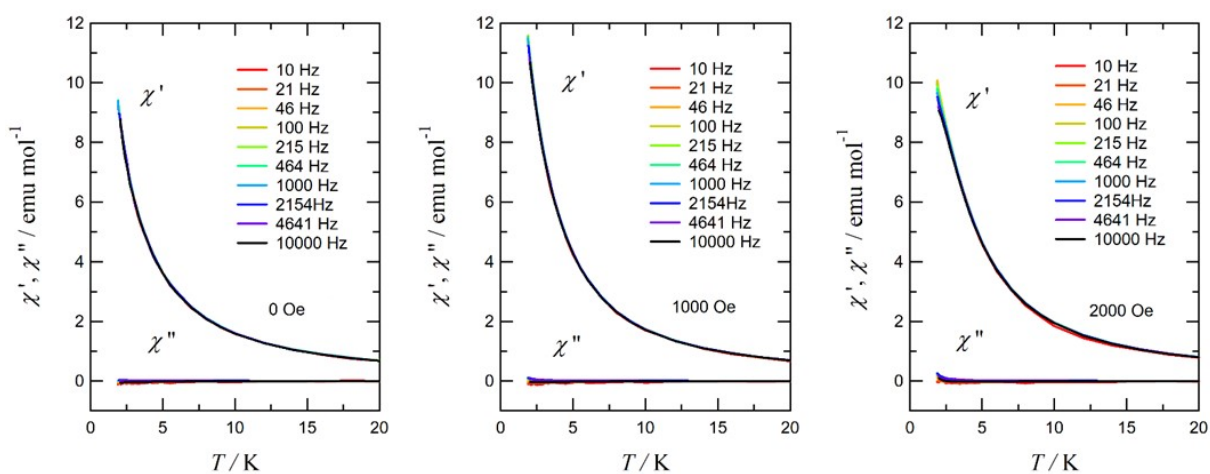

**Figure S14.** AC magnetic susceptibilities (in-phase  $\chi'$  and out-of-phase  $\chi''$ ) measured for **C3**. The applied dc bias fields (0, 1000, and 2000 Oe) are indicated. Lines are shown as a guide to the eye.
